# Supplementary material for: The Utility of an Online Forward Triage Tool During the SARS-CoV-2 Pandemic: Health Care Provider and Health Authority Perspectives
Source: Frontiers journal article supplement (doi:10.3389/fpubh.2022.845996), 2022-07-08
Supplement: Data_Sheet_1.pdf [file Data_Sheet_1.pdf]

## Appendix 1: Interview Guide: Coronatest.ch -Health Care Providers

### **Rapport**

Please describe what your role (organisation) was in the COVID-19 pandemic (formal, informal, evolved, new roles emerging)

### **Utility in reducing Health system burden**

- Did you refer any patients to our online tool coronatest.ch during the pandemic? Why did you do that or why not, other tools used, which and why?
- What attributes should a tool have to be useful to you and your practice? Information, utility, what did patients look for?
- Looking back did you respond accordingly or did the pandemic take you by surprise? (Dismissed patients as having hysteria)

### **Utility as a reliable information source**

- What do you recommend to make the coronatest.ch more effective-suggestions for improvement? How did you keep yourself up to date?

### **Illness and testing Experience**

- What was your own COVID-19 experience that you would like to share (prompt falling ill, fear of falling ill, protecting oneself, protecting other patients, challenges- testing kit availability, did you offer testing, why and why not, comments to changing testing criteria)?

### **Challenges and Recommendations**

- Any lessons you learnt at personal or organizational or health system level
- What was the greatest challenge you experienced?
- How do you plan to deal with this in future pandemics?
- How best should such an epidemic be handled in future
- Adequacy of medical education in such situations and recommendations
